# Supplementary material for: Distinguishing mutants that resist drugs via different mechanisms by examining fitness tradeoffs
Source: eLife. 2024 Sep 10;13:RP94144. doi: 10.7554/eLife.94144 (PMC11386965; doi:10.7554/eLife.94144)
Supplement: Supplementary file 1. [file elife-94144-supp1.xlsx]

## Sheet: mutants_updated_neutrals_11923
barcode	bartender_sequence	Isolate	Genotype	second	third	fourth	fifth	GenotypeAbbrev
1154	ATTGCCAGGCTTTTGAAGCC	A1-5_CS_37C_10	HDA1_Ser600Ser					HDA1
9277	TAATATTGTGCATAGAACTT	A1-5_CS_37C_6	PDR1_Ala763Thr					PDR
722	GTTGCGTCGGAAGGAGGAAT	A1-5_CS_37C_9	PDR1_Pro261Leu					PDR
943	GAGTCATAATACGGGCGACC	A1-5_CS_col1	PDR1_Arg310Thr	PDR3_Leu279Phe	OPT1_Val143Ile	RSC30_Gly571Asp	YHR217C_Pro33His	PDR
1091	TGAACGTCATTTTCTTTACT	A1-5_CS_col2	PDR1_Phe297Ser+	OPT1_Val143Ile	SRD1_Glu97Lys	KSP1_Gly276Glu		PDR
1044	GGTGTATAATATACTTTGAA	A1-5_CS_col3	PDR1_Leu1053Pro					PDR
527	TTATAACTGATCATTCTAGT	A1-5_CS_col5	PDR1_Leu722Phe					PDR
6584	GAACCCTTGATTTTACGAAA	A2-5_CS_col3	SUR1_Gln77*					SUR1
1143	TGGCAAACATTTATGATGTA	A3-12_1	HSC82_Glu542*+	IRA1_Tyr40Asn	OPT1_Val143Ile	MVP1_Arg409Ile	FKS3_Met174Leu	HSC82/IRA1
298	GGAGTTTATGAAGTTGTGCC	A3-5CS_200Rad_1	PDR1_Thr1043Ala+	OPT1_Val143Ile	YBR220C_Gly269Asp			PDR
3274	CTGCAATAAATGCTTTTCTT	A3-5CS_200Rad_3	PDR3_Phe835Val	OPT1_Val143Ile				PDR
500	AAACTAAATTTATTAAAAGT	A3-5CS_Rad37C_1	PDR3_Ser900Cys+	RPB2_Pro316Ser	SIP5_Lys401Asn			PDR
751	AGCAGTCCTGTTTTTATGCG	A3-5CS_Rad37C_2	PDR1_Ser138Cys					PDR
6904	ATTACTTCTTGTCGGCTACT	A3-5CS_Rad37C_4	PDR1_Val1048Phe+	NRG2_Ile182Met				PDR
548	TCATATGATGCATTTATATA	A3-6_col3	PDR3_Cys707Phe	VPS8_Val1237Ile				PDR
583	ATCAAGCACAGTCAATAGCT	A3-6col2	HSC82_Leu62*					HSC82
2575	GTTTGACTGGCGTGTGGTGG	B1-18col3	SUR1_Pro162Thr					SUR1
37	GCTAGACCGGTACAATCAAT	B1-18col4	UPC2_Gly417Asp					UPC2
712	CACATCAGTGTTGCGGTTCG	B1-18col5	PDR1_As08Asn					PDR
538	TTTCCTCTTTTAGGAGCCGG	B1-5_CS_col1	PDR1_Phe285Ser+	BEM2_Asn493Lys				PDR
427	TTCAATTGAATCTATGTTTG	B2-5_CS_col6	PDR1_Thr817Lys					PDR
930	TTGTTCATAGTGAGATTGGC	B2-8_col1	PDR1_Glu768Asp+	OSH2_Val52Ile	TAF11_Ala174Ala			PDR
408	TCTATAATCCTCATATGAAC	B2-8_col2	PDR1_Asn251Asp	ENP1_Ile399Met				PDR
421	CAACTAAGCATACTAATTCC	B3-16col3	PDR3_Glu952Lys					PDR
454	TTCTGTCCGGTGCATCGCGG	B3-16col5	PDR1_Leu403Ser+	TRP3_Leu464Phe				PDR
618	CGTTACAAGCATTGGGGGGC	B3-20col1	PDR3_Leu279Phe+	AKL1_Ser865Pro	RSC30_Gly571Asp	VPS8_Leu1236Arg	VPS8_Pro1235Arg	PDR
672	CCCCAGCGCGCGGGGGGGGG	B3-4_col1	PDR1_Arg310Met+	MRPL27_Arg63Ile	LYS20_Thr29Met			PDR
628	CCACGCGGTGCTTCTTGACG	C1-20col1	PDR1_Thr644Arg					PDR
432	AGCCGTTAATTAACGCTTGT	C1-5_CS_col3	PDR1_Lys302Asn+	IRA1_Glu2440*				PDR
290	AAATGGAGACTTGCCCTTGA	C1-5_CS_col4	PDR1_Gly280Cys					PDR
882	AGCGAGTATTGTCCGGAACA	C2-25col3	PDR3_Leu959Met+	OPT1_Val143Ile				PDR
1012	ATCATAATTGAGTGTCGTAT	C2-25col4	PDR3_Ala246Val+	ADY3_Ser222Cys	RSC30_Gly571Asp	YNL040W_Glu210Lys		PDR
8144	GCATCTATTTGGGATTAGTG	C3-10col1	PDR1_Ser748Pro					PDR
1164	TTCTATATGAAATACTGAAC	C3-10col7	PDR3_Arg840Ile+	YNL338W_Thr30Thr				PDR
987	CCTGCAAACGAAATAATAGG	C3-20col1	GPB2_Ser371Tyr+	OPT1_Val143Ile	MPH1_Gln146Lys	SIS1_Met149Arg		GPB2
1053	CTTCCAACTGGACTCGGAGT	C3-4_col3	IRA2_Pro2050Leu					IRA2
441	CTTGTACACAAAGCTTTATG	C3-5_CS_col5	PDR1_Arg310Met					PDR
341	TGAAGGCTTTCACCACCTTG	C3-5_CS_col6	PDR1_Lys540Asn					PDR
384	TGCTTGATAGTAGGTGACAC	C4-11col2	TAE2_Glu727Glu					TAE2
445	AACTGTGCTATTGTTCTGGC	C4-11col6	PDR1_Thr817Lys					PDR
3836	CGGTTTGCGTCAGGTAGTTG	D1-5_CS_42C_9	PDR1_Phe312Phe					PDR
788	GCGATTCCGTCAGAGTCCCC	D1-5_CS_col2	PDR1_Ile263Ser	IRA1_Gly635Gly				PDR
484	TCTAATTAATAATGGCTTCA	D2-12_5	YME1_Val357Phe	YNL010W_Ile104Leu	YOR387C_Val41Phe			YME1
743	TATAAGCTATGCAGAAATGA	D2-12col1	GPB2_Tyr411*+	OPT1_Val143Ile	SRD1_Glu97Lys	RSC30_Gly571Asp		GPB2
1129	CGTATACATTTTCACATACA	D2-16col3	D2-16col3					Not seq
1161	GCTTGTACATTTAAAAGGAC	D2-16col4	IRA1_Ser692*+	LYS20_Thr29Met	SRD1_Glu97Lys			IRA1
1073	AAGACGGTTCTATAAAAATA	D2-20col1	YIR042C_Thr130Lys	OPT1_Val143Ile+				YIR042C
1119	AAACTAACCCTGGTCGGACA	D2-20col6	SRD1_Glu97Lys	RSC30_Gly571Asp				Not seq
1055	ACCAACAATTGAGCCCCAAT	D2-8_1	SGE1_Val376Ile+	OPT1_Val143Ile				SGE1
1128	CTCGAGGAGGGGGGAGAAGT	D2-8_2	IRA1_Glu2772*+	MKS1_Ser419Arg				IRA1
894	TTTCGAATACCCAGTATTTT	D2-8_3	IRA1_Gln2083*+	IRA1_Leu3019Phe	LYS20_Thr29Met	RSC30_Gly571Asp		IRA1
533	CCGCACTGAGGTTAGCGAAG	NA	PDR1_Cys323Arg					PDR
10498	TGATTATTGATCAGATATGA	NA	PDR1_Thr859Lys+	LAA1_Leu1554Phe				PDR
			Excluded: Present in multiple lineages
