# Supplementary material for: Distinguishing mutants that resist drugs via different mechanisms by examining fitness tradeoffs
Source: eLife. 2024 Sep 10;13:RP94144. doi: 10.7554/eLife.94144 (PMC11386965; doi:10.7554/eLife.94144)
Supplement: Supplementary file 2. — *For the High Radicicol +Low Fluconazole condition, 95 instead of 96 samples were measured due to undetectable growth in one well. [file elife-94144-supp2.xlsx]

## Sheet: Sheet1
Evolution Conditions	Diploids detected (96 sampled)	Estimated % diploid
Low Rad	8	0.083
Med Rad	0	0
High Rad	0	0
Low Flu	9	0.094
Med Flu	0	0
High Flu	1	0.01
LR + LF	4	0.042
HR +LF*	1	0.011
LR + HF	1	0.01
HR + HF	3	0.031
DMSO	6	0.063
No Drug	9	0.094
